# Supplementary material for: Quantification of FRET-induced angular displacement by monitoring sensitized acceptor anisotropy using a dim fluorescent donor
Source: PubMed Central journal article supplement (PMC8099864; doi:10.1038/s41467-021-22816-7), 2021-05-05
Supplement: 41467_2021_22816_MOESM6_ESM.pdf [file 41467_2021_22816_MOESM6_ESM.pdf]

**Title:** Supplementary Movie 1:

**Description:** Ca<sup>2+</sup> imaging in HeLa cells with GeuSapVC2.60. The movie is in IMD mode. Color hue indicates anisotropy. Scale bar is 10  $\mu\text{m}$ .

**Title:** Supplementary Movie 2:

**Description:** Ca<sup>2+</sup> imaging in HeLa cells with GeuSapVC3.60. The movie is in IMD mode. Color hue indicates anisotropy. Scale bar is 10  $\mu\text{m}$ .
